# Supplementary material for: Constitutional Mutations in RTEL1 Cause Severe Dyskeratosis Congenita
Source: PubMed Central journal article supplement (PMC3591859; doi:10.1016/j.ajhg.2013.02.001), 2013-03-07
Supplement: mmc1.pdf [file mmc1.pdf]

The American Journal of Human Genetics, Volume 92

## **Supplemental Data**

### **Constitutional Mutations in *RTEL1***

### **Cause Severe Dyskeratosis Congenita**

Amanda J. Walne, Tom Vulliamy, Michael Kirwan, Vincent Plagnol, and Inderjeet Dokal

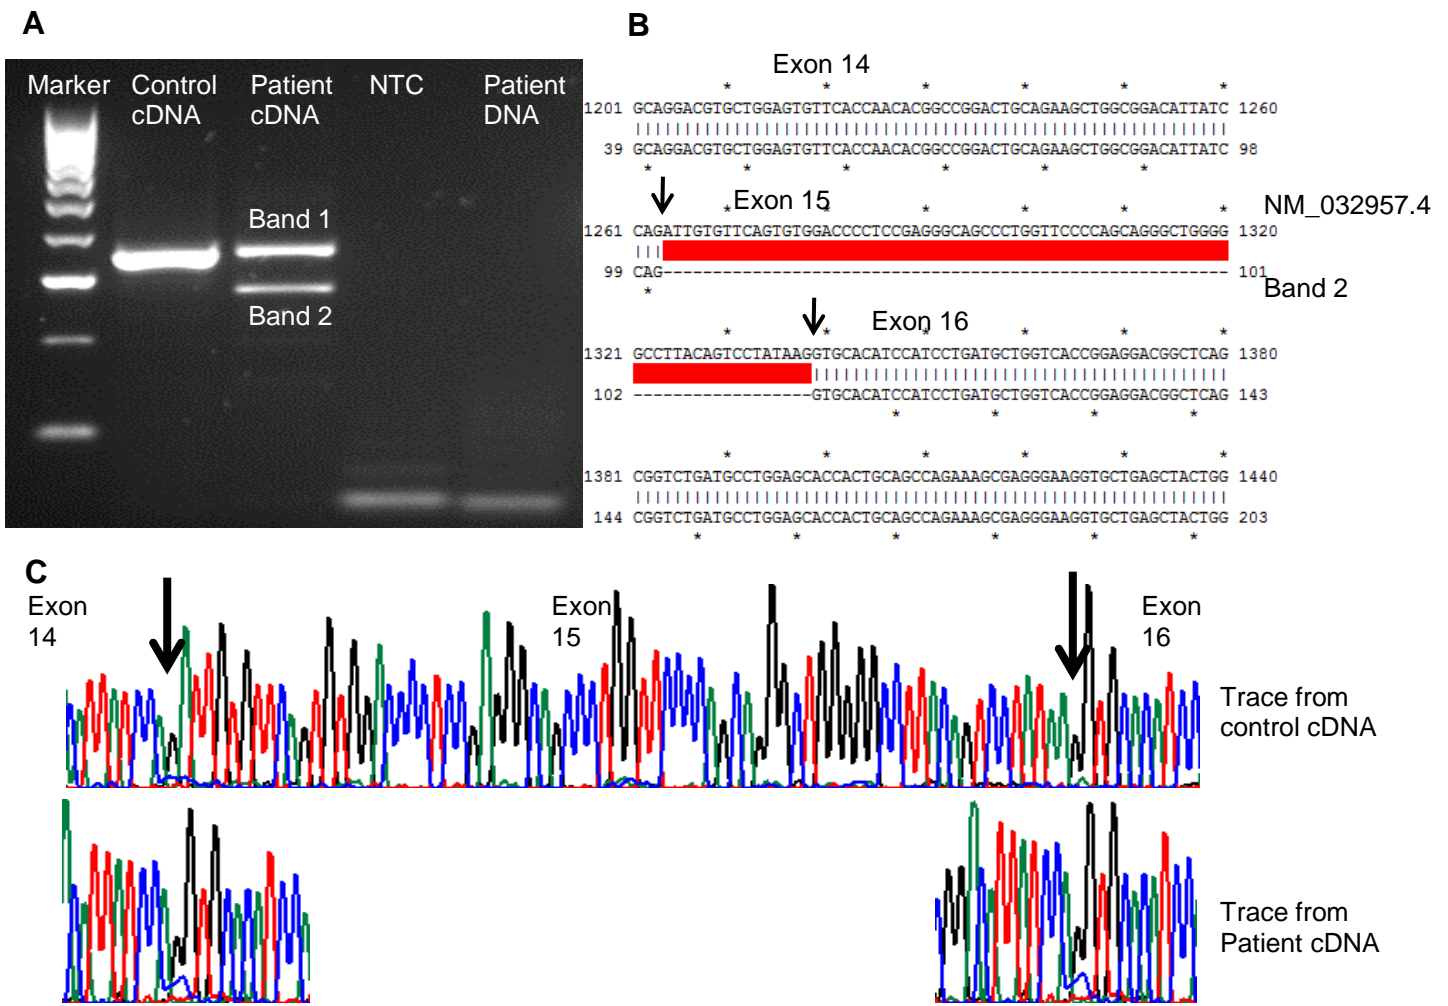

**Figure S1. Confirmation that the c.1263+3A>G Mutation Disrupts Splicing**

(A) Gel image showing the presence of the splice variant caused by the genomic mutation c.1263+3A>G. Band 2 was excised from the gel and sequenced. NTC = no template control. Patient DNA was included to show the primers gave a product that was unique to the cDNA.

(B) Sequence alignment of the reference with Band 2 showing that exon 15 is spliced from the variant in frame.

(C) Control sequencing trace compared with Band 2 trace. Arrows show exon boundaries.

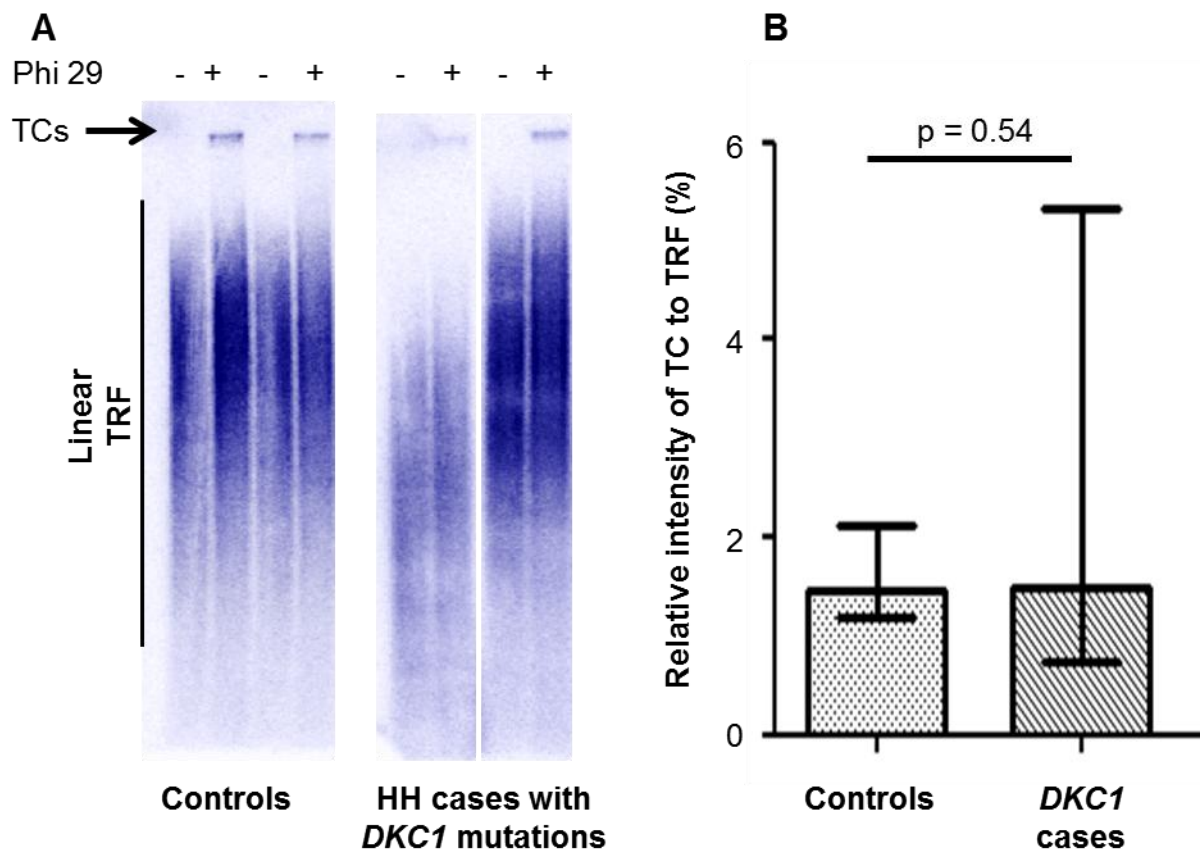

**Figure S2. T-Circle Production in HH Cases with *DKC1* Mutations Is Not Increased Compared with Controls**

(A) Mutations in *DKC1* have no significant effect on T-circle accumulation. Linear terminal restriction fragments (TRF) and Phi-29 dependant T-circles (TCs) are detected in genomic DNA by Southern blot analysis.

(B) Graphical representation of the intensity of T-circles to TRF in controls (n=10) and HH cases with *DKC1* mutations (n=5). Box plot of median value also showing interquartile range, p value calculated using a Mann Whitney U test.

**Table S1. List of Potential Candidate Genes Remaining after Exome Sequencing of DCR129**

| <b>Gene</b>   | <b>Full Name</b>                             | <b>MIM Number</b> | <b>AA Change 1</b>  | <b>AA Change 2</b>  | <b>Chr.</b> | <b>Function</b>                          |
|---------------|----------------------------------------------|-------------------|---------------------|---------------------|-------------|------------------------------------------|
| <i>BBX</i>    | bobby sox homolog (Drosophila)               | N/A               | p.A139T             | p.S22N              | 3           | Transcription factor                     |
| <i>FAM38A</i> | family with sequence similarity 38, member A | 611184            | p.Q1036delinsQER    | p.Q1032delinsQEE    | 16          | Ion channel component                    |
| <i>ANKLE1</i> | ankyrin repeat and LEM domain containing 1   | N/A               | p.643_644del        | p.643_644del        | 19          | Induced DNA cleavage and damage response |
| <i>WDR87</i>  | WD repeat domain 87                          | N/A               | p.2295_2301del      | p.2295_2301del      | 19          | Also known as testes development protein |
| <i>ZNF714</i> | zinc finger protein 714                      | N/A               | p.Q69X              | p.Y102delinsYN      | 19          | Associated with cleft lip syndrome       |
| <i>RTEL1</i>  | regulator of telomere elongation helicase 1  | 608833            | p.Gly763Val         | p.Arg1264His        | 20          | Telomere elongation and stability        |
| <i>NEFH</i>   | neurofilament, heavy polypeptide             | 162230            | p.E650delinsEQAKSPE | p.K647delinsRSPEKAK | 22          | Biomarker of neuronal damage             |

**Table S2. Clinical Features of Individuals with HH Screened in This Study Who Did Not Have Biallelic *RTEL1* Mutations**

| <b>DCR/DCV</b>             | <b>80</b> | <b>99</b> | <b>102</b> | <b>118</b> | <b>144</b> | <b>159</b> | <b>162</b> | <b>179</b> | <b>223</b> | <b>259</b> | <b>291</b> | <b>309</b> | <b>312</b> | <b>326</b> | <b>361</b> | <b>373</b> | <b>DCV206</b> |
|----------------------------|-----------|-----------|------------|------------|------------|------------|------------|------------|------------|------------|------------|------------|------------|------------|------------|------------|---------------|
| Age at report              | <1        | 2         | 2          | <1         | 13         | 3          | 5          | 2          | 2          | 1          | 2          | 1          | 3          | 8          | 0          | 10         | 22            |
| Sex                        | M         | F         | M          | M          | ?          | M          | M          | F          | F          | M          | F          | M          | M          | M          | M          | M          | M             |
| Global bone marrow failure | yes       | yes       | yes        | yes        | yes        | yes        | yes        | yes        | yes        | yes        | yes        | yes        | yes        | yes        | yes        | yes        | yes           |
| Immuno-deficiency          |           |           | yes        |            | yes        |            |            | yes        | yes        |            |            |            | yes        |            | yes        |            |               |
| Cerebellar Hypoplasia      | yes       | yes       | yes        | yes        | yes        | yes        | yes        | yes        | yes        | yes        | yes        | yes        | yes        | yes        | yes        | yes        | yes           |
| Microcephaly               |           |           | yes        | yes        | yes        | yes        |            | yes        | yes        | yes        | yes        |            |            | yes        |            | yes        | yes           |
| IUGR                       |           |           |            | yes        |            | yes        |            | yes        | yes        |            |            | yes        |            |            | yes        |            |               |
| Growth retardation         | yes       |           | yes        | yes        |            | yes        |            |            |            |            | yes        |            |            | yes        |            |            | yes           |
| Developmental delay        | yes       | yes       | yes        | yes        | yes        | yes        | yes        | yes        | yes        | yes        |            |            |            | yes        |            | yes        | yes           |
| Abnormal skin pigmentation |           |           |            |            |            | yes        |            |            |            |            | yes        |            |            |            |            | yes        |               |
| Nail dystrophy             |           | yes       |            |            |            | yes        |            |            |            |            | yes        |            |            | yes        |            |            |               |
| Leukoplakia                |           | yes       | yes        |            |            | yes        |            |            |            |            | yes        |            |            |            |            |            |               |

IUGR = Intrauterine growth restriction; DCV = DC variant, this represents a group of patients who have a bone marrow failure disorder but not enough clinical features to be entered into the DCR.

**Table S3. Location and Predicted Consequence of Mutations Identified in *RTEL1***

| Nucleotide Change <sup>a</sup> | Protein Change <sup>a</sup> | Exon | Protein Domain and/or Consequence      | PolyPhen Score <sup>b</sup> | Zygoty       |
|--------------------------------|-----------------------------|------|----------------------------------------|-----------------------------|--------------|
| c.102+2T>C                     |                             | 2    | Predicted to affect splicing           | NA                          | Heterozygous |
| c.823G>A                       | p.Glu275Lys                 | 9    | DEAH box                               | 1.00                        | Heterozygous |
| c.1263+3A>G                    | p.del422-446                | 15   | skip exon 15 <sup>c</sup>              | NA                          | Heterozygous |
| c.1548 G>T                     | p.Met516Ile                 | 17   | dinG domain <sup>d</sup>               | 0.734                       | Heterozygous |
| c.2201 T>G                     | p.Leu734Arg                 | 24   | dinG domain                            | 1.00                        | Heterozygous |
| c.2288 G>T                     | p.Gly763Val                 | 25   | dinG domain                            | 1.00                        | Heterozygous |
| c.2761 A>G                     | p.Lys921Glu                 | 29   | Function unknown                       | 0.971                       | Heterozygous |
| c.2941 C>T <sup>e</sup>        | p.Arg981Trp <sup>e</sup>    | 30   | Function unknown                       | 1.00                        | Heterozygous |
| c.2964 T>G                     | p.Phe988Leu                 | 30   | Function unknown                       | 0.486                       | Homozygous   |
| c.2992 C>T                     | p.Arg998Ter                 | 30   | Premature truncation at amino acid 998 | NA                          | Heterozygous |
| c.3791 G>A <sup>f</sup>        | p.Arg1264His <sup>f</sup>   | 35   | Function unknown                       | 0.994                       | Heterozygous |

<sup>a</sup> = numbering relative to NM\_032.957.1 and NP\_116575.3 except for <sup>f</sup>; <sup>b</sup> = polymorphism phenotyping; <sup>c</sup> = experimentally verified; <sup>d</sup> dinG domain = Rad3-related helicase domain; <sup>e</sup> = recurrent mutation; <sup>f</sup> = numbering relative to coding sequence and protein translation from isoform uc021wge.1; NA = not applicable.
